# Supplementary material for: Protein domain organisation: adding order
Source: PubMed Central journal article supplement (PMC2657131; doi:10.1186/1471-2105-10-39), 2009-01-29

**A. Degree**

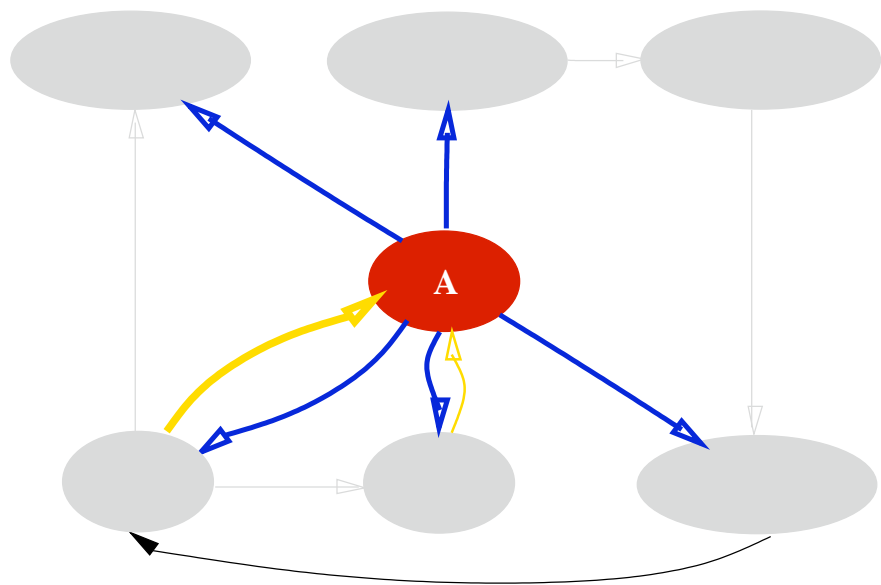

**B. Clustering Coefficient**

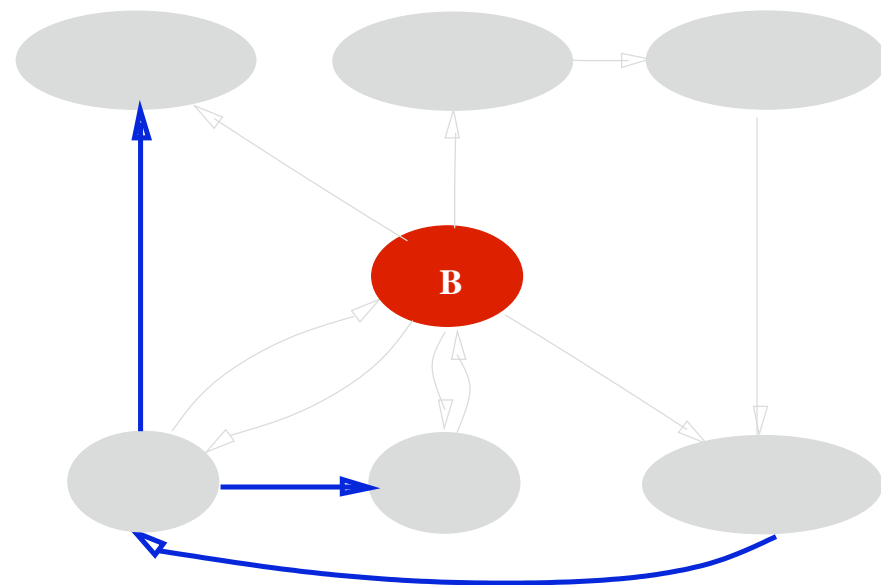

**C. Path Length**

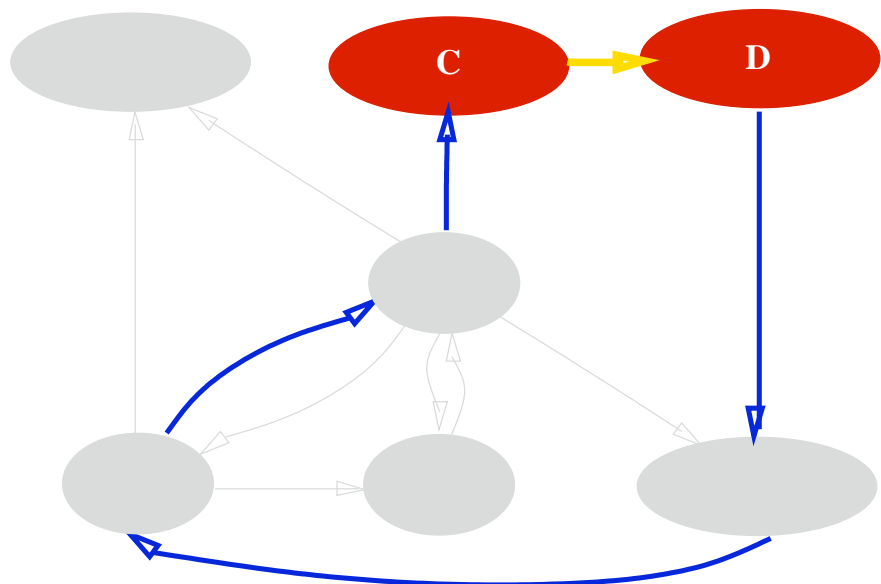

**D. Network density**

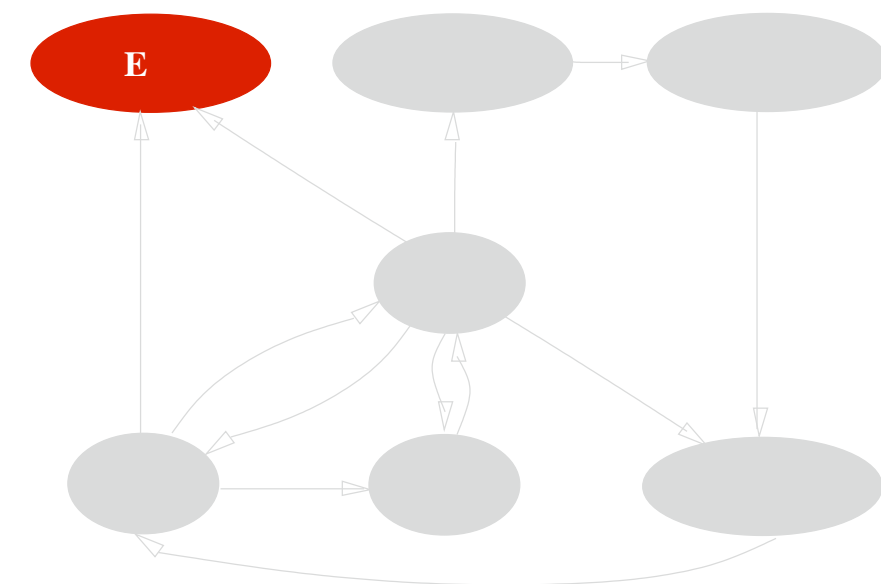

Supplement: 1471-2105-10-39-S1.pdf [file 1471-2105-10-39-S1.pdf]
