# Supplementary material for: Protein domain organisation: adding order
Source: PubMed Central journal article supplement (PMC2657131; doi:10.1186/1471-2105-10-39), 2009-01-29
Supplement: 1471-2105-10-39-S2.pdf [file 1471-2105-10-39-S2.pdf]

| Genome/s                                                    | Domains | Degree | Clustering Coefficient  | Density             | Path Length       |
|-------------------------------------------------------------|---------|--------|-------------------------|---------------------|-------------------|
| all genomes                                                 | 1070    | 3.59   | 0.1390 (0.0494, 0.0041) | 57.74 (60.64, 0.58) | 3.87 (3.83, 0.02) |
| archaea                                                     | 424     | 1.12   | 0.0760 (0.0091, 0.0035) | 9.57 (14.33, 1.50)  | 4.99 (5.36, 0.33) |
| bacteria                                                    | 794     | 2.20   | 0.0965 (0.0282, 0.0037) | 40.57 (43.02, 0.97) | 4.53 (4.40, 0.05) |
| eukaryotes                                                  | 890     | 2.65   | 0.1306 (0.0349, 0.0042) | 49.32 (53.13, 0.78) | 4.33 (4.14, 0.03) |
| unicellular eukaryotes                                      | 341     | 0.88   | 0.0504 (0.0031, 0.0025) | 3.23 (4.44, 1.09)   | 4.18 (5.03, 0.78) |
| multicellular eukaryotes                                    | 739     | 1.89   | 0.1186 (0.0201, 0.0041) | 33.12 (40.67, 1.10) | 4.73 (4.64, 0.06) |
| <i>Aquifex aeolicus</i> VF5                                 | 218     | 0.76   | 0.0237 (0.0034, 0.0032) | 1.90 (3.01, 0.70)   | 2.83 (3.55, 0.55) |
| <i>Acinetobacter</i> sp. ADP1                               | 276     | 0.79   | 0.0353 (0.0020, 0.0022) | 2.59 (2.69, 0.72)   | 4.51 (4.13, 0.71) |
| <i>Propionibacterium acnes</i> KPA171202                    | 222     | 0.74   | 0.0269 (0.0015, 0.0020) | 1.42 (1.91, 0.53)   | 2.68 (3.38, 0.68) |
| <i>Archaeoglobus fulgidus</i> DSM 4304                      | 208     | 0.81   | 0.0394 (0.0031, 0.0028) | 1.75 (4.26, 1.19)   | 2.60 (4.32, 0.77) |
| <i>Anopheles gambiae</i> 22.2b                              | 385     | 0.91   | 0.0663 (0.0032, 0.0027) | 4.80 (6.71, 1.46)   | 6.05 (6.10, 0.80) |
| <i>Candida albicans</i>                                     | 191     | 0.66   | 0.0431 (0.0008, 0.0020) | 0.72 (1.06, 0.20)   | 1.80 (2.44, 0.44) |
| <i>Aspergillus nidulans</i> 1 r3.1                          | 246     | 0.79   | 0.0399 (0.0024, 0.0027) | 2.51 (3.14, 0.83)   | 4.02 (4.27, 0.77) |
| <i>Aeropyrum pernix</i> K1                                  | 140     | 0.72   | 0.0161 (0.0024, 0.0031) | 1.49 (2.56, 0.64)   | 2.09 (3.00, 0.55) |
| <i>Arabidopsis thaliana</i> 5                               | 338     | 0.92   | 0.0689 (0.0055, 0.0033) | 4.46 (6.95, 1.25)   | 4.07 (4.98, 0.55) |
| <i>Agrobacterium tumefaciens</i> C58                        | 118     | 0.68   | 0.0611 (0.0013, 0.0033) | 1.43 (1.55, 0.28)   | 2.05 (2.19, 0.37) |
| <i>Mycobacterium avium</i> ssp. <i>paratuberculosis</i> k10 | 267     | 0.80   | 0.0417 (0.0025, 0.0026) | 2.36 (3.26, 0.87)   | 4.01 (4.30, 0.75) |
| <i>Bacillus anthracis</i> Ames                              | 317     | 0.85   | 0.0366 (0.0038, 0.0025) | 4.28 (4.18, 1.07)   | 4.80 (4.52, 0.67) |
| <i>Borrelia burgdorferi</i> B31                             | 117     | 0.74   | 0.0134 (0.0028, 0.0036) | 2.42 (2.98, 0.64)   | 2.54 (2.79, 0.45) |
| <i>Bacillus cereus</i> ATCC 14579                           | 310     | 0.87   | 0.0420 (0.0037, 0.0027) | 4.34 (4.34, 1.17)   | 4.78 (4.71, 0.73) |
| <i>Bdellovibrio bacteriovorus</i> HD100                     | 236     | 0.79   | 0.0510 (0.0028, 0.0028) | 2.06 (2.81, 0.74)   | 3.71 (3.67, 0.63) |
| <i>Bordetella pertussis</i> Tohama I                        | 267     | 0.82   | 0.0531 (0.0030, 0.0029) | 2.71 (4.04, 1.03)   | 3.89 (4.47, 0.74) |
| <i>Candidatus Blochmannia floridanus</i>                    | 148     | 0.70   | 0.0337 (0.0019, 0.0028) | 1.59 (2.16, 0.44)   | 2.26 (2.70, 0.42) |
| <i>Bacillus halodurans</i> C-125                            | 306     | 0.83   | 0.0294 (0.0033, 0.0024) | 4.76 (4.01, 1.06)   | 4.85 (4.54, 0.73) |
| <i>Bradyrhizobium japonicum</i> USDA 110                    | 303     | 0.93   | 0.0604 (0.0038, 0.0029) | 5.53 (7.54, 1.85)   | 5.94 (5.86, 0.85) |
| <i>Bifidobacterium longum</i> NCC2705                       | 175     | 0.72   | 0.0276 (0.0014, 0.0024) | 1.19 (1.69, 0.40)   | 2.13 (2.84, 0.57) |
| <i>Brucella melitensis</i> 16M                              | 254     | 0.81   | 0.0402 (0.0025, 0.0026) | 2.86 (3.46, 0.96)   | 4.11 (4.47, 0.83) |
| <i>Bordetella bronchiseptica</i> RB50                       | 289     | 0.87   | 0.0591 (0.0035, 0.0030) | 3.55 (5.37, 1.33)   | 4.67 (4.94, 0.73) |
| <i>Bordetella parapertussis</i> 12822                       | 286     | 0.85   | 0.0596 (0.0031, 0.0028) | 3.39 (4.64, 1.15)   | 4.61 (4.79, 0.73) |
| <i>Bartonella quintana</i> Toulouse                         | 179     | 0.73   | 0.0260 (0.0020, 0.0026) | 2.57 (2.38, 0.54)   | 3.90 (3.20, 0.55) |
| <i>Brucella suis</i> 1330                                   | 250     | 0.80   | 0.0336 (0.0022, 0.0024) | 2.49 (2.74, 0.74)   | 4.00 (3.99, 0.76) |
| <i>Bacillus subtilis</i> ssp. <i>subtilis</i> 168           | 316     | 0.84   | 0.0359 (0.0028, 0.0024) | 4.80 (3.76, 1.14)   | 5.46 (4.80, 0.84) |
| <i>Bacteroides thetaotaomicron</i> VPI-5482                 | 263     | 0.83   | 0.0486 (0.0026, 0.0026) | 2.70 (3.77, 0.98)   | 4.21 (4.54, 0.76) |
| <i>Buchnera aphidicola</i> Bp                               | 144     | 0.71   | 0.0421 (0.0016, 0.0028) | 2.79 (2.22, 0.54)   | 3.81 (2.97, 0.59) |
| <i>Chlamydomonas reinhardtii</i> Gp116                      | 153     | 0.75   | 0.0358 (0.0024, 0.0032) | 2.95 (2.65, 0.62)   | 4.03 (3.12, 0.55) |
| <i>Clostridium acetobutylicum</i> ATCC 824                  | 282     | 0.82   | 0.0379 (0.0026, 0.0024) | 2.87 (3.10, 0.94)   | 4.28 (4.34, 0.81) |
| <i>Caulobacter crescentus</i> CB15                          | 271     | 0.83   | 0.0377 (0.0027, 0.0025) | 2.47 (3.76, 1.09)   | 3.69 (4.63, 0.87) |

|                                                                  |     |      |                         |                     |                   |
|------------------------------------------------------------------|-----|------|-------------------------|---------------------|-------------------|
| <i>Corynebacterium diphtheriae</i> NCTC 13129                    | 230 | 0.73 | 0.0338 (0.0012, 0.0020) | 0.94 (1.36, 0.36)   | 2.18 (3.05, 0.66) |
| <i>Caenorhabditis elegans</i> WS123                              | 317 | 0.81 | 0.0592 (0.0025, 0.0027) | 2.65 (3.60, 1.06)   | 5.38 (5.03, 0.92) |
| <i>Corynebacterium glutamicum</i> ATCC 13032                     | 235 | 0.78 | 0.0396 (0.0021, 0.0025) | 1.55 (2.61, 0.78)   | 3.00 (3.84, 0.74) |
| <i>Chlorobium tepidum</i> TLS                                    | 235 | 0.77 | 0.0235 (0.0025, 0.0023) | 1.83 (3.01, 0.73)   | 2.87 (3.83, 0.60) |
| <i>Ciona intestinalis</i> 1.0                                    | 380 | 1.10 | 0.0880 (0.0051, 0.0034) | 10.98 (17.83, 1.62) | 6.01 (6.20, 0.33) |
| <i>Campylobacter jejuni</i> ssp. <i>jejuni</i> NCTC 11168        | 196 | 0.74 | 0.0288 (0.0022, 0.0026) | 1.87 (2.39, 0.60)   | 2.99 (3.33, 0.59) |
| <i>Chlamydia muridarum</i>                                       | 136 | 0.76 | 0.0364 (0.0039, 0.0044) | 2.64 (3.30, 0.76)   | 2.73 (3.07, 0.49) |
| <i>Corynebacterium efficiens</i> YS-314                          | 216 | 0.77 | 0.0323 (0.0018, 0.0024) | 1.75 (2.64, 0.72)   | 3.30 (4.01, 0.78) |
| <i>Chlamydomphila pneumoniae</i> J138                            | 142 | 0.74 | 0.0391 (0.0026, 0.0035) | 2.00 (2.67, 0.58)   | 2.44 (2.92, 0.48) |
| <i>Synechocystis</i> sp. PCC 6803                                | 262 | 0.77 | 0.0455 (0.0019, 0.0023) | 1.40 (1.97, 0.54)   | 3.49 (3.61, 0.71) |
| <i>Chlamydia trachomatis</i> D/UW-3/CX                           | 134 | 0.76 | 0.0399 (0.0031, 0.0040) | 2.24 (3.07, 0.75)   | 2.53 (3.03, 0.52) |
| <i>Clostridium perfringens</i> 13                                | 266 | 0.80 | 0.0329 (0.0026, 0.0024) | 2.13 (2.72, 0.72)   | 3.01 (3.77, 0.63) |
| <i>Caenorhabditis briggsae</i> Aug03                             | 309 | 0.82 | 0.0781 (0.0025, 0.0032) | 1.41 (3.56, 0.98)   | 2.94 (4.90, 0.83) |
| <i>Coxiella burnetii</i> RSA 493                                 | 229 | 0.79 | 0.0319 (0.0033, 0.0029) | 3.83 (3.51, 0.81)   | 4.68 (3.87, 0.58) |
| <i>Chlamydomonas reinhardtii</i> 2.0                             | 226 | 0.80 | 0.0561 (0.0035, 0.0032) | 1.73 (3.33, 0.92)   | 2.97 (3.93, 0.71) |
| <i>Danio rerio</i> 22.3b                                         | 459 | 1.26 | 0.0940 (0.0081, 0.0036) | 15.60 (24.15, 1.37) | 5.18 (5.39, 0.16) |
| <i>Debaromyces hansenii</i>                                      | 197 | 0.67 | 0.0371 (0.0011, 0.0021) | 0.86 (1.24, 0.25)   | 2.00 (2.60, 0.44) |
| <i>Drosophila melanogaster</i> 3.2                               | 264 | 0.80 | 0.0497 (0.0021, 0.0026) | 2.12 (2.35, 0.66)   | 4.61 (4.00, 0.78) |
| <i>Desulfotalea psychrophila</i> LSV54                           | 265 | 0.85 | 0.0358 (0.0035, 0.0028) | 2.62 (4.17, 1.03)   | 3.47 (4.33, 0.66) |
| <i>Deinococcus radiodurans</i> R1                                | 258 | 0.78 | 0.0257 (0.0027, 0.0024) | 2.19 (2.69, 0.69)   | 3.34 (3.74, 0.62) |
| <i>Dictyostelium discoideum</i> 2                                | 252 | 0.75 | 0.0483 (0.0017, 0.0024) | 1.28 (2.07, 0.57)   | 2.85 (3.78, 0.74) |
| <i>Desulfovibrio vulgaris</i> ssp. <i>vulgaris</i> Hildenborough | 243 | 0.88 | 0.0360 (0.0042, 0.0030) | 6.28 (5.34, 1.26)   | 5.28 (4.47, 0.62) |
| <i>Escherichia coli</i> K12                                      | 343 | 0.86 | 0.0389 (0.0029, 0.0023) | 4.26 (4.58, 1.20)   | 5.53 (5.15, 0.80) |
| <i>Enterococcus faecalis</i> V583                                | 229 | 0.80 | 0.0358 (0.0035, 0.0031) | 2.89 (3.23, 0.95)   | 4.02 (3.89, 0.71) |
| <i>Erwinia carotovora</i> ssp. <i>atroseptica</i> SCRI1043       | 314 | 0.82 | 0.0469 (0.0029, 0.0025) | 3.12 (3.92, 0.97)   | 4.48 (4.69, 0.73) |
| <i>Encephalitozoon cuniculi</i>                                  | 121 | 0.66 | 0.0337 (0.0016, 0.0029) | 1.74 (1.57, 0.27)   | 2.51 (2.17, 0.35) |
| <i>Fusarium graminearum</i> 1                                    | 242 | 0.77 | 0.0472 (0.0022, 0.0026) | 1.62 (2.88, 0.73)   | 3.06 (4.08, 0.69) |
| <i>Fusobacterium nucleatum</i> ssp. <i>nucleatum</i> ATCC 25586  | 215 | 0.77 | 0.0343 (0.0025, 0.0029) | 2.07 (2.50, 0.60)   | 3.00 (3.38, 0.57) |
| <i>Trypanosoma brucei</i>                                        | 166 | 0.71 | 0.0442 (0.0022, 0.0031) | 1.60 (2.26, 0.51)   | 2.51 (3.02, 0.51) |
| <i>Leishmania major</i>                                          | 173 | 0.68 | 0.0467 (0.0010, 0.0023) | 0.88 (1.25, 0.25)   | 1.93 (2.52, 0.49) |
| 3rd genome                                                       | 191 | 0.73 | 0.0577 (0.0017, 0.0028) | 1.19 (2.38, 0.63)   | 2.20 (3.45, 0.66) |
| <i>Borrelia garinii</i> PBI                                      | 118 | 0.73 | 0.0132 (0.0030, 0.0037) | 2.39 (2.84, 0.58)   | 2.53 (2.68, 0.41) |
| <i>Gallus gallus</i> 22.1                                        | 403 | 1.09 | 0.0851 (0.0062, 0.0034) | 10.48 (16.23, 1.54) | 5.72 (5.98, 0.38) |
| <i>Candida glabrata</i>                                          | 187 | 0.67 | 0.0418 (0.0012, 0.0023) | 0.92 (1.55, 0.35)   | 2.01 (2.96, 0.57) |
| <i>Ashbya gossypii</i> 1.0                                       | 198 | 0.68 | 0.0460 (0.0010, 0.0022) | 0.81 (1.24, 0.28)   | 1.93 (2.70, 0.53) |
| <i>Magnaporthe grisea</i> 7 r2.3                                 | 220 | 0.72 | 0.0562 (0.0019, 0.0028) | 0.94 (1.70, 0.44)   | 2.04 (3.13, 0.60) |
| <i>Geobacter sulfurreducens</i> PCA                              | 291 | 0.86 | 0.0395 (0.0035, 0.0025) | 4.42 (3.73, 1.00)   | 5.70 (4.48, 0.77) |
| <i>Gloeobacter violaceus</i> PCC 7421                            | 287 | 0.83 | 0.0405 (0.0024, 0.0022) | 3.78 (4.33, 1.22)   | 5.74 (5.01, 0.87) |
| <i>Halobacterium</i> sp. NRC-1                                   | 190 | 0.78 | 0.0334 (0.0026, 0.0029) | 1.61 (3.20, 0.87)   | 2.50 (3.81, 0.69) |

|                                                           |     |      |                         |                     |                   |
|-----------------------------------------------------------|-----|------|-------------------------|---------------------|-------------------|
| <i>Haemophilus ducreyi</i> 35000HP                        | 212 | 0.75 | 0.0326 (0.0024, 0.0027) | 2.76 (2.34, 0.55)   | 4.04 (3.29, 0.54) |
| <i>Helicobacter hepaticus</i> ATCC 51449                  | 213 | 0.71 | 0.0298 (0.0013, 0.0021) | 1.31 (1.56, 0.37)   | 2.72 (2.98, 0.56) |
| <i>Haemophilus influenzae</i> Rd KW20                     | 238 | 0.74 | 0.0295 (0.0020, 0.0023) | 2.35 (2.04, 0.52)   | 4.03 (3.38, 0.59) |
| <i>Bartonella henselae</i> Houston-1                      | 186 | 0.76 | 0.0322 (0.0021, 0.0029) | 2.51 (2.34, 0.59)   | 3.72 (3.24, 0.60) |
| <i>Helicobacter pylori</i> 26695                          | 184 | 0.68 | 0.0349 (0.0015, 0.0024) | 1.62 (1.80, 0.38)   | 2.77 (2.86, 0.46) |
| <i>Homo sapiens</i> 22.34d                                | 389 | 0.99 | 0.0639 (0.0038, 0.0028) | 10.62 (12.17, 1.62) | 7.30 (6.59, 0.56) |
| <i>Kluyveromyces lactis</i>                               | 194 | 0.65 | 0.0311 (0.0011, 0.0020) | 0.85 (1.28, 0.26)   | 2.04 (2.67, 0.46) |
| <i>Bacillus thuringiensis</i> ser. <i>konkukian</i> 97-27 | 313 | 0.88 | 0.0388 (0.0042, 0.0027) | 4.75 (5.13, 1.23)   | 4.79 (4.80, 0.69) |
| <i>Kluyveromyces waltii</i>                               | 192 | 0.64 | 0.0388 (0.0009, 0.0021) | 0.77 (1.05, 0.20)   | 1.95 (2.42, 0.43) |
| <i>Lactobacillus plantarum</i> WCFS1                      | 216 | 0.79 | 0.0333 (0.0031, 0.0030) | 2.67 (2.84, 0.77)   | 3.38 (3.56, 0.62) |
| <i>Listeria innocua</i> Clip11262                         | 268 | 0.81 | 0.0335 (0.0037, 0.0028) | 3.31 (3.78, 0.98)   | 4.24 (4.11, 0.64) |
| <i>Lactobacillus johnsonii</i> NCC 533                    | 181 | 0.76 | 0.0233 (0.0022, 0.0027) | 1.94 (2.71, 0.67)   | 2.75 (3.41, 0.61) |
| <i>Lactococcus lactis</i> ssp. <i>lactis</i> III403       | 218 | 0.80 | 0.0436 (0.0024, 0.0028) | 2.97 (3.05, 0.88)   | 4.16 (3.95, 0.73) |
| <i>Listeria monocytogenes</i> EGD-e                       | 259 | 0.81 | 0.0361 (0.0041, 0.0032) | 3.44 (3.80, 1.00)   | 4.09 (4.11, 0.68) |
| <i>Leptospira interrogans</i> ser. Lai 56601              | 221 | 0.80 | 0.0443 (0.0026, 0.0027) | 1.77 (2.18, 0.52)   | 3.47 (3.34, 0.59) |
| <i>Leifsonia xyli</i> ssp. <i>xyli</i> CTCB07             | 194 | 0.72 | 0.0238 (0.0015, 0.0022) | 1.20 (1.97, 0.52)   | 2.24 (3.31, 0.66) |
| <i>Mycoplasma mobile</i> 163K                             | 93  | 0.73 | 0.0151 (0.0028, 0.0040) | 2.28 (3.44, 0.70)   | 2.00 (2.60, 0.39) |
| <i>Methanococcus maripaludis</i> S2                       | 186 | 0.76 | 0.0236 (0.0024, 0.0028) | 1.52 (2.80, 0.72)   | 2.37 (3.47, 0.62) |
| <i>Methanosarcina acetivorans</i> C2A                     | 227 | 0.80 | 0.0490 (0.0026, 0.0028) | 1.46 (2.75, 0.70)   | 2.57 (3.73, 0.64) |
| <i>Mycobacterium tuberculosis</i> H37Rv                   | 273 | 0.85 | 0.0440 (0.0031, 0.0026) | 3.60 (4.27, 1.19)   | 4.49 (4.64, 0.79) |
| <i>Mycobacterium bovis</i> AF2122/97                      | 271 | 0.85 | 0.0448 (0.0029, 0.0026) | 3.65 (4.16, 1.21)   | 4.51 (4.65, 0.83) |
| <i>Methanothermobacter thermoautotrophicus</i> Delta H    | 190 | 0.79 | 0.0345 (0.0038, 0.0033) | 3.18 (4.62, 1.10)   | 3.69 (4.20, 0.64) |
| <i>Mycoplasma penetrans</i> HF-2                          | 108 | 0.69 | 0.0192 (0.0014, 0.0028) | 1.69 (2.35, 0.47)   | 2.02 (2.50, 0.42) |
| <i>Mesoplasma florum</i> L1                               | 107 | 0.76 | 0.0228 (0.0026, 0.0038) | 2.10 (2.99, 0.64)   | 2.21 (2.72, 0.45) |
| <i>Mycoplasma genitalium</i> G-37                         | 90  | 0.73 | 0.0156 (0.0031, 0.0045) | 2.38 (3.34, 0.64)   | 1.99 (2.45, 0.36) |
| <i>Mycoplasma mycoides</i> ssp. <i>mycoides</i> SC PG1    | 110 | 0.73 | 0.0162 (0.0018, 0.0029) | 1.98 (2.75, 0.64)   | 2.24 (2.76, 0.51) |
| <i>Methanocaldococcus jannaschii</i> DSM 2661             | 161 | 0.77 | 0.0298 (0.0024, 0.0029) | 1.86 (3.40, 0.87)   | 2.41 (3.61, 0.63) |
| <i>Mesorhizobium loti</i> MAF303099                       | 298 | 0.88 | 0.0441 (0.0039, 0.0028) | 4.34 (5.81, 1.45)   | 4.57 (5.19, 0.75) |
| <i>Mycobacterium leprae</i> TN                            | 209 | 0.74 | 0.0388 (0.0017, 0.0024) | 1.25 (1.81, 0.45)   | 2.36 (3.15, 0.58) |
| <i>Mus musculus</i> 22.32b                                | 416 | 1.02 | 0.0807 (0.0036, 0.0030) | 10.66 (11.97, 1.77) | 7.80 (6.88, 0.65) |
| <i>Methanopyrus kandleri</i> AV19                         | 147 | 0.73 | 0.0260 (0.0019, 0.0025) | 1.16 (1.89, 0.40)   | 1.76 (2.62, 0.45) |
| <i>Mycoplasma pneumoniae</i> M129                         | 92  | 0.73 | 0.0154 (0.0025, 0.0036) | 2.19 (3.44, 0.67)   | 1.93 (2.58, 0.39) |
| <i>Mycoplasma pulmonis</i> UAB CTIP                       | 102 | 0.72 | 0.0129 (0.0017, 0.0027) | 1.93 (2.66, 0.52)   | 2.00 (2.46, 0.40) |
| <i>Mycoplasma gallisepticum</i> R                         | 86  | 0.70 | 0.0164 (0.0020, 0.0038) | 1.94 (2.87, 0.56)   | 1.79 (2.41, 0.38) |
| <i>Methanosarcina mazei</i> Go1                           | 210 | 0.83 | 0.0462 (0.0030, 0.0031) | 1.77 (3.34, 0.88)   | 2.84 (3.91, 0.69) |
| <i>Nanoarchaeum equitans</i> Kim4-M                       | 57  | 0.68 | 0.0200 (0.0024, 0.0052) | 2.57 (3.15, 0.64)   | 1.87 (2.17, 0.43) |
| <i>Nitrosomonas europaea</i> ATCC 19718                   | 256 | 0.78 | 0.0392 (0.0026, 0.0026) | 2.05 (2.65, 0.64)   | 3.67 (3.71, 0.60) |
| <i>Neisseria meningitidis</i> MC58                        | 221 | 0.77 | 0.0408 (0.0022, 0.0025) | 2.28 (2.18, 0.50)   | 3.76 (3.26, 0.53) |
| <i>Nostoc</i> sp. PCC 7120                                | 289 | 0.88 | 0.0648 (0.0025, 0.0028) | 2.56 (4.48, 1.29)   | 4.82 (5.19, 0.92) |

|                                                                 |     |      |                         |                    |                   |
|-----------------------------------------------------------------|-----|------|-------------------------|--------------------|-------------------|
| <i>Neurospora crassa</i> 3                                      | 218 | 0.72 | 0.0393 (0.0014, 0.0024) | 1.06 (1.35, 0.29)  | 2.38 (2.79, 0.50) |
| <i>Oceanobacillus iheyensis</i> HTE831                          | 279 | 0.82 | 0.0274 (0.0035, 0.0026) | 4.87 (3.72, 0.96)  | 4.99 (4.29, 0.68) |
| <i>Oryza sativa</i> ssp. <i>japonica</i> 2.0                    | 343 | 0.98 | 0.0782 (0.0061, 0.0035) | 8.39 (11.16, 1.44) | 5.62 (5.54, 0.46) |
| <i>Onion yellow phytoplasma</i> OY-M                            | 95  | 0.76 | 0.0115 (0.0028, 0.0038) | 2.42 (4.09, 0.96)  | 2.09 (2.96, 0.51) |
| <i>Parachlamydia</i> sp. UWE25                                  | 183 | 0.74 | 0.0237 (0.0022, 0.0027) | 1.68 (2.43, 0.57)  | 2.63 (3.21, 0.56) |
| <i>Picrophilus torridus</i> DSM 9790                            | 160 | 0.72 | 0.0288 (0.0020, 0.0027) | 1.53 (2.33, 0.54)  | 2.37 (3.00, 0.49) |
| <i>Pseudomonas aeruginosa</i> PAO1                              | 335 | 0.93 | 0.0552 (0.0041, 0.0029) | 7.03 (6.53, 1.59)  | 6.13 (5.50, 0.80) |
| <i>Pyrococcus abyssi</i> GE5                                    | 177 | 0.77 | 0.0251 (0.0025, 0.0029) | 1.70 (2.69, 0.71)  | 2.52 (3.35, 0.63) |
| <i>Pyrobaculum aerophilum</i> IM2                               | 175 | 0.73 | 0.0175 (0.0026, 0.0029) | 1.59 (2.54, 0.59)  | 2.42 (3.22, 0.54) |
| <i>Photorhabdus luminescens</i> ssp. <i>laumondii</i> TTO1      | 311 | 0.84 | 0.0459 (0.0028, 0.0025) | 3.62 (3.40, 0.92)  | 4.87 (4.49, 0.75) |
| <i>Porphyromonas gingivalis</i> W83                             | 203 | 0.76 | 0.0386 (0.0025, 0.0028) | 2.12 (2.45, 0.63)  | 2.93 (3.31, 0.61) |
| <i>Pyrococcus horikoshii</i> OT3                                | 167 | 0.76 | 0.0329 (0.0024, 0.0032) | 1.53 (2.34, 0.56)  | 2.40 (3.14, 0.57) |
| <i>Pirellula</i> sp. 1                                          | 260 | 0.83 | 0.0423 (0.0031, 0.0027) | 1.73 (3.74, 1.00)  | 2.90 (4.41, 0.74) |
| <i>Plasmodium falciparum</i> 1                                  | 110 | 0.61 | 0.0290 (0.0009, 0.0025) | 1.19 (1.45, 0.24)  | 1.90 (2.20, 0.39) |
| <i>Pasteurella multocida</i> Pm70                               | 250 | 0.76 | 0.0335 (0.0021, 0.0024) | 2.63 (2.43, 0.66)  | 4.36 (3.73, 0.65) |
| <i>Schizosaccharomyces pombe</i>                                | 225 | 0.72 | 0.0366 (0.0017, 0.0024) | 1.36 (1.75, 0.43)  | 2.70 (3.15, 0.59) |
| <i>Prochlorococcus marinus</i> ssp. <i>marinus</i> CCMP1375     | 187 | 0.73 | 0.0273 (0.0019, 0.0025) | 1.59 (2.36, 0.62)  | 2.63 (3.40, 0.62) |
| <i>Pseudomonas putida</i> KT2440                                | 314 | 0.91 | 0.0467 (0.0042, 0.0028) | 5.45 (6.38, 1.38)  | 4.85 (5.15, 0.70) |
| <i>Pseudomonas syringae</i> pv. <i>tomato</i> DC3000            | 318 | 0.90 | 0.0550 (0.0041, 0.0029) | 4.68 (5.44, 1.39)  | 4.72 (4.96, 0.75) |
| <i>Pyrococcus furiosus</i> DSM 3638                             | 177 | 0.79 | 0.0400 (0.0029, 0.0032) | 1.71 (3.16, 0.85)  | 2.49 (3.59, 0.65) |
| <i>Plasmodium yoelii</i> ssp. <i>yoelii</i> 1                   | 117 | 0.64 | 0.0178 (0.0011, 0.0028) | 1.35 (1.48, 0.24)  | 2.04 (2.10, 0.33) |
| <i>Phytophthora ramorum</i> 1.0                                 | 317 | 0.80 | 0.0688 (0.0025, 0.0030) | 1.47 (3.15, 0.88)  | 3.12 (4.72, 0.86) |
| <i>Rickettsia conorii</i> Malish 7                              | 151 | 0.72 | 0.0193 (0.0025, 0.0032) | 2.25 (2.39, 0.51)  | 2.82 (2.78, 0.43) |
| <i>Rhodopseudomonas palustris</i> CGA009                        | 280 | 0.85 | 0.0483 (0.0031, 0.0027) | 2.99 (4.21, 1.22)  | 4.11 (4.73, 0.82) |
| <i>Rhodobacter sphaeroides</i>                                  | 269 | 0.80 | 0.0355 (0.0022, 0.0024) | 2.09 (2.26, 0.61)  | 3.63 (3.73, 0.68) |
| <i>Rattus norvegicus</i> 22.3b                                  | 428 | 1.04 | 0.0713 (0.0038, 0.0028) | 9.74 (13.68, 1.54) | 6.78 (6.62, 0.52) |
| <i>Rickettsia prowazekii</i> Madrid E                           | 142 | 0.75 | 0.0305 (0.0030, 0.0036) | 4.26 (3.12, 0.66)  | 4.27 (2.98, 0.45) |
| <i>Ralstonia solanacearum</i> GM1000                            | 274 | 0.80 | 0.0360 (0.0025, 0.0024) | 2.77 (2.85, 0.75)  | 4.27 (4.11, 0.70) |
| <i>Rickettsia typhi wilmington</i>                              | 142 | 0.73 | 0.0273 (0.0024, 0.0032) | 2.44 (2.60, 0.50)  | 2.74 (2.74, 0.39) |
| <i>Shigella flexneri</i> 2a. 301                                | 326 | 0.84 | 0.0360 (0.0027, 0.0023) | 4.43 (4.20, 1.07)  | 5.63 (4.96, 0.76) |
| <i>Staphylococcus epidermidis</i> ATCC 12228                    | 241 | 0.78 | 0.0361 (0.0028, 0.0027) | 2.90 (3.20, 0.79)  | 4.24 (3.91, 0.62) |
| <i>Streptococcus agalactiae</i> 2603V/R                         | 219 | 0.80 | 0.0383 (0.0026, 0.0026) | 2.14 (3.31, 0.85)  | 3.32 (3.90, 0.64) |
| <i>Streptococcus mutans</i> UA159                               | 211 | 0.80 | 0.0395 (0.0024, 0.0026) | 1.93 (3.06, 0.96)  | 3.24 (3.98, 0.83) |
| <i>Streptomyces avermitilis</i> MA-4680                         | 311 | 0.95 | 0.0552 (0.0048, 0.0030) | 5.67 (8.31, 1.76)  | 4.93 (5.66, 0.73) |
| <i>Staphylococcus aureus</i> ssp. <i>aureus</i> Mu150           | 257 | 0.81 | 0.0351 (0.0032, 0.0028) | 3.16 (3.36, 0.82)  | 4.15 (3.99, 0.62) |
| <i>Symbiobacterium thermophilum</i> IAM 14863                   | 266 | 0.84 | 0.0394 (0.0033, 0.0026) | 4.61 (4.42, 1.15)  | 5.04 (4.63, 0.76) |
| <i>Saccharomyces cerevisiae</i>                                 | 193 | 0.72 | 0.0415 (0.0016, 0.0025) | 1.09 (1.74, 0.40)  | 2.32 (3.09, 0.58) |
| <i>Streptomyces coelicolor</i> A3(2)                            | 309 | 0.99 | 0.0587 (0.0051, 0.0031) | 5.24 (8.87, 1.47)  | 4.46 (5.52, 0.60) |
| <i>Salmonella enterica</i> ssp. <i>enterica</i> ser. Typhi CT18 | 312 | 0.84 | 0.0444 (0.0032, 0.0026) | 4.36 (4.66, 1.21)  | 5.04 (4.86, 0.75) |

|                                                                |     |      |                         |                     |                   |
|----------------------------------------------------------------|-----|------|-------------------------|---------------------|-------------------|
| <i>Phytophthora sojae</i> 1.0                                  | 282 | 0.82 | 0.0705 (0.0027, 0.0031) | 1.05 (3.23, 0.89)   | 2.28 (4.42, 0.77) |
| <i>Shewanella oneidensis</i> MR-1                              | 312 | 0.84 | 0.0461 (0.0031, 0.0026) | 3.59 (4.03, 1.11)   | 4.81 (4.72, 0.79) |
| <i>Sinorhizobium meliloti</i> 1021                             | 271 | 0.82 | 0.0428 (0.0023, 0.0024) | 2.61 (2.97, 0.83)   | 4.13 (4.26, 0.76) |
| <i>Streptococcus pyogenes</i> MGAS10394                        | 201 | 0.81 | 0.0344 (0.0030, 0.0027) | 3.24 (3.76, 1.05)   | 3.98 (4.01, 0.70) |
| <i>Streptococcus pyogenes</i> M1 GAS                           | 197 | 0.79 | 0.0364 (0.0029, 0.0029) | 3.42 (3.48, 0.98)   | 4.09 (3.88, 0.68) |
| <i>Streptococcus pneumoniae</i> TIGR4                          | 214 | 0.76 | 0.0391 (0.0017, 0.0024) | 1.63 (2.24, 0.64)   | 3.14 (3.55, 0.73) |
| <i>Sulfobolus solfataricus</i> P2                              | 187 | 0.76 | 0.0256 (0.0020, 0.0025) | 1.21 (2.14, 0.58)   | 2.12 (3.17, 0.62) |
| <i>Salmonella typhimurium</i> LT2                              | 314 | 0.86 | 0.0453 (0.0032, 0.0026) | 4.77 (4.92, 1.25)   | 5.33 (5.08, 0.79) |
| <i>Sulfobolus tokodaii</i> 7                                   | 187 | 0.78 | 0.0304 (0.0021, 0.0026) | 1.43 (2.34, 0.67)   | 2.46 (3.33, 0.67) |
| <i>Synechococcus</i> sp. WH 8102                               | 235 | 0.69 | 0.0233 (0.0011, 0.0017) | 1.08 (1.34, 0.31)   | 2.68 (2.97, 0.55) |
| <i>Thermus thermophilus</i> HB27                               | 253 | 0.78 | 0.0287 (0.0027, 0.0025) | 2.29 (3.42, 0.85)   | 3.34 (4.12, 0.65) |
| <i>Thermoplasma acidophilum</i> DSM 1728                       | 160 | 0.78 | 0.0389 (0.0029, 0.0033) | 1.64 (3.49, 0.93)   | 2.32 (3.61, 0.66) |
| <i>Trypanosoma brucei</i>                                      | 15  | 0.53 | 0.1000 (0.0010, 0.0099) | 5.71 (5.63, 0.55)   | 1.42 (1.40, 0.15) |
| <i>Treponema denticola</i> ATCC 35405                          | 199 | 0.72 | 0.0273 (0.0023, 0.0026) | 1.59 (2.13, 0.50)   | 2.56 (3.06, 0.48) |
| <i>Clostridium tetani</i> E88                                  | 241 | 0.83 | 0.0227 (0.0033, 0.0027) | 2.86 (3.16, 0.79)   | 3.46 (3.74, 0.60) |
| <i>Thermosynechococcus elongatus</i> BP-1                      | 251 | 0.81 | 0.0440 (0.0024, 0.0026) | 2.15 (3.26, 0.83)   | 3.91 (4.26, 0.76) |
| <i>Thalassiosira pseudonana</i>                                | 322 | 0.76 | 0.0507 (0.0022, 0.0024) | 1.57 (2.63, 0.66)   | 3.21 (4.18, 0.68) |
| <i>Thermotoga maritima</i> MSB8                                | 225 | 0.84 | 0.0386 (0.0032, 0.0029) | 2.47 (4.42, 1.19)   | 3.13 (4.42, 0.75) |
| <i>Fugu rubripes</i> 22.2c                                     | 435 | 1.06 | 0.0697 (0.0048, 0.0029) | 10.71 (16.22, 1.41) | 5.90 (6.22, 0.36) |
| <i>Treponema pallidum</i> ssp. <i>pallidum</i> Nichols         | 139 | 0.69 | 0.0220 (0.0015, 0.0025) | 1.69 (1.98, 0.41)   | 2.44 (2.58, 0.43) |
| <i>Thermoanaerobacter tengcongensis</i>                        | 264 | 0.84 | 0.0361 (0.0042, 0.0030) | 4.19 (4.42, 1.17)   | 4.50 (4.37, 0.70) |
| <i>Thermoplasma volcanium</i> GSS1                             | 155 | 0.80 | 0.0287 (0.0039, 0.0036) | 1.91 (4.28, 1.10)   | 2.38 (3.72, 0.62) |
| <i>Tropheryma whippelii</i> Twist                              | 147 | 0.69 | 0.0409 (0.0011, 0.0024) | 1.26 (1.47, 0.33)   | 2.24 (2.47, 0.50) |
| <i>Ustilago maydis</i> 1 r2                                    | 150 | 0.71 | 0.0493 (0.0019, 0.0031) | 1.30 (2.03, 0.47)   | 2.05 (2.90, 0.54) |
| <i>Ureaplasma parvum</i> ser. 3 ATCC 700970                    | 82  | 0.72 | 0.0131 (0.0031, 0.0046) | 2.45 (3.35, 0.66)   | 2.04 (2.43, 0.36) |
| <i>Vibrio vulnificus</i> YJ016                                 | 323 | 0.87 | 0.0382 (0.0030, 0.0024) | 4.82 (4.97, 1.27)   | 4.99 (5.25, 0.82) |
| <i>Vibrio cholerae</i> O1 <i>biovar eltor</i> N16961           | 303 | 0.81 | 0.0477 (0.0027, 0.0025) | 4.29 (4.33, 1.07)   | 4.82 (4.82, 0.73) |
| <i>Chromobacterium violaceum</i> ATCC 12472                    | 308 | 0.87 | 0.0516 (0.0028, 0.0026) | 3.22 (4.30, 1.19)   | 4.53 (4.96, 0.85) |
| <i>Vibrio parahaemolyticus</i> RIMD 2210633                    | 318 | 0.87 | 0.0435 (0.0035, 0.0027) | 5.12 (5.60, 1.33)   | 4.95 (5.12, 0.74) |
| <i>Vibrio vulnificus</i> CMCP6                                 | 325 | 0.86 | 0.0419 (0.0032, 0.0025) | 3.98 (5.26, 1.24)   | 4.76 (5.22, 0.77) |
| <i>Wigglesworthia glossinidia</i>                              | 161 | 0.69 | 0.0332 (0.0016, 0.0025) | 2.44 (2.00, 0.44)   | 3.69 (2.77, 0.45) |
| <i>Wolbachia</i>                                               | 167 | 0.69 | 0.0206 (0.0015, 0.0024) | 1.61 (1.80, 0.36)   | 2.57 (2.69, 0.44) |
| <i>Wolmella succinogenes</i> DSM 1740                          | 233 | 0.76 | 0.0425 (0.0022, 0.0026) | 1.49 (2.60, 0.66)   | 3.27 (3.76, 0.63) |
| <i>Xanthomonas axonopodis</i> pv. <i>citri</i> 306             | 299 | 0.89 | 0.0466 (0.0031, 0.0025) | 3.38 (4.90, 1.28)   | 4.45 (4.96, 0.76) |
| <i>Xanthomonas campestris</i> pv. <i>campestris</i> ATCC 33913 | 303 | 0.88 | 0.0421 (0.0033, 0.0026) | 4.92 (5.65, 1.40)   | 5.03 (5.18, 0.75) |
| <i>Xenopus tropicalis</i> 2.0                                  | 548 | 1.39 | 0.0895 (0.0113, 0.0035) | 27.26 (30.73, 1.33) | 5.49 (5.33, 0.12) |
| <i>Xylella fastidiosa</i> 9a5c                                 | 249 | 0.80 | 0.0366 (0.0025, 0.0027) | 2.33 (2.52, 0.64)   | 3.81 (3.67, 0.64) |
| <i>Pan troglodytes</i> 22.1                                    | 406 | 1.07 | 0.0703 (0.0053, 0.0031) | 13.04 (16.24, 1.68) | 6.89 (6.32, 0.42) |
| <i>Saccharomyces bayanus</i> MIT                               | 209 | 0.67 | 0.0471 (0.0010, 0.0022) | 0.82 (1.46, 0.35)   | 1.97 (3.05, 0.61) |

|                                             |     |      |                         |                   |                   |
|---------------------------------------------|-----|------|-------------------------|-------------------|-------------------|
| <i>Saccharomyces mikatae</i> MIT            | 200 | 0.68 | 0.0355 (0.0013, 0.0023) | 0.94 (1.41, 0.32) | 2.12 (2.79, 0.53) |
| <i>Saccharomyces paradosus</i> MIT          | 197 | 0.68 | 0.0309 (0.0015, 0.0023) | 0.95 (1.56, 0.35) | 2.05 (2.90, 0.52) |
| <i>Yarrowia lipolytica</i>                  | 208 | 0.72 | 0.0431 (0.0014, 0.0024) | 1.11 (1.71, 0.40) | 2.33 (3.18, 0.62) |
| <i>Yersinia pestis</i> CO92                 | 302 | 0.85 | 0.0547 (0.0032, 0.0027) | 3.38 (4.46, 1.13) | 4.51 (4.80, 0.75) |
| <i>Yersinia pseudotuberculosis</i> IP 32953 | 309 | 0.86 | 0.0490 (0.0033, 0.0027) | 3.34 (4.46, 1.19) | 4.48 (4.87, 0.79) |
